# Supplementary material
Source: PubMed Central journal article supplement (PMC6536300)
Supplement: NIHMS1524479-supplement-Supplemental_File.pdf [file NIHMS1524479-supplement-Supplemental_File.pdf]

# Supplement Material

## Supplementary Figure I

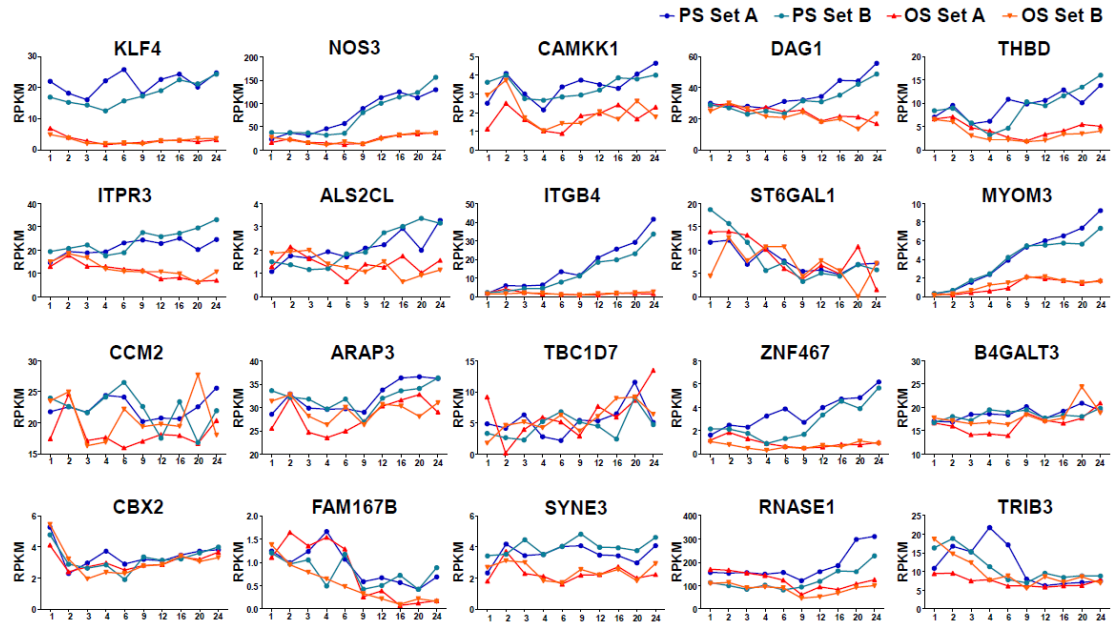

**Supplementary Figure I. RNA-sequencing analysis of identified 18 genes under shear stress.** HUVECs were exposed to OS or PS for the 10 time-point as indicated. RNA samples collected at each time-point underwent RNA-seq analysis. mRNA levels of identified 18 genes represented by reads per kilobase million mapped reads (RPKM). Each time-point under OS or PS includes two biological repeats.

## Supplementary Figure II

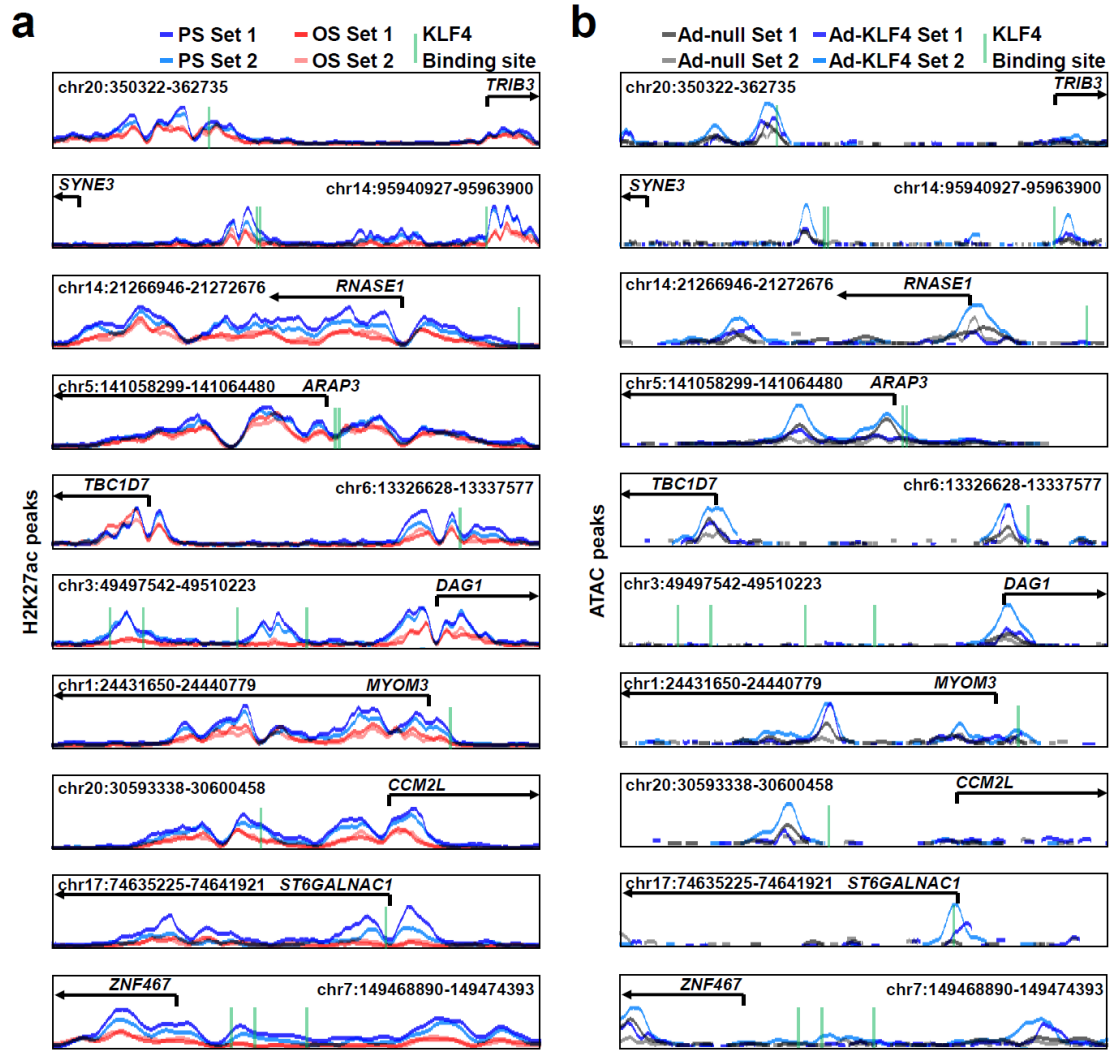

**Supplementary Figure II. PS-induced genes via KLF4-dependent chromatin remodeling.** (a) Normalized PS (blue)- or OS (red)-induced H3K27ac enrichment in the promoter regions of *TRIB3*, *SYNE3*, *RNASE1*, *ARAP3*, *TBC1D7*, *DAG1*, *MYOM3*, *CCM2L*, *ST6GALNAC1*, and *ZNF467*. The putative KLF4 binding sites in the respective promoter regions are illustrated in green. (b) HUVECs were infected with Ad-null or Ad-KLF4 for 24 hr in two biological repeats. ATAC-seq was performed to evaluate the chromatin accessibility. Lines in gray (from Ad-null-infected ECs) and blue (from Ad-KLF4-infected ECs) represent ATAC signals in the same loci as those in (a).

### Supplementary Figure III

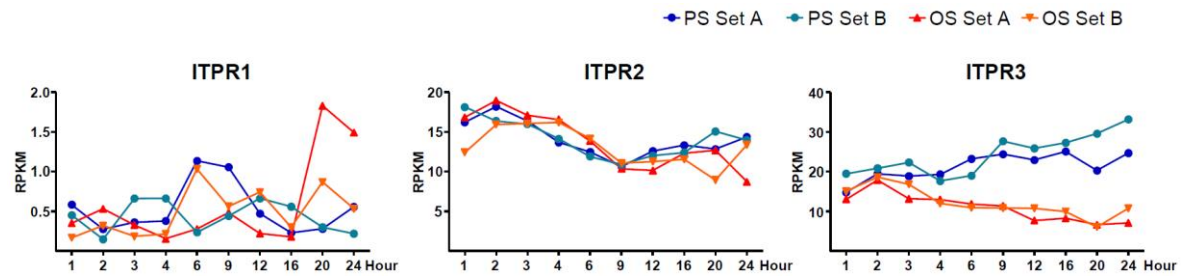

**Supplementary Figure III. RNA-seq data demonstrating PS upregulation of ITPR3 in ECs.** HUVECs were exposed to OS or PS for the indicated times. RNA samples were collected and underwent RNA-seq analysis. mRNA levels of ITPR1, ITPR2, and ITPR3 are represented as reads per kilobase million mapped reads (RPKM). Two biologic repeats were performed for each group. The conclusions were made by comparing the averaged values from the two sets of data.

## Supplementary Figure IV

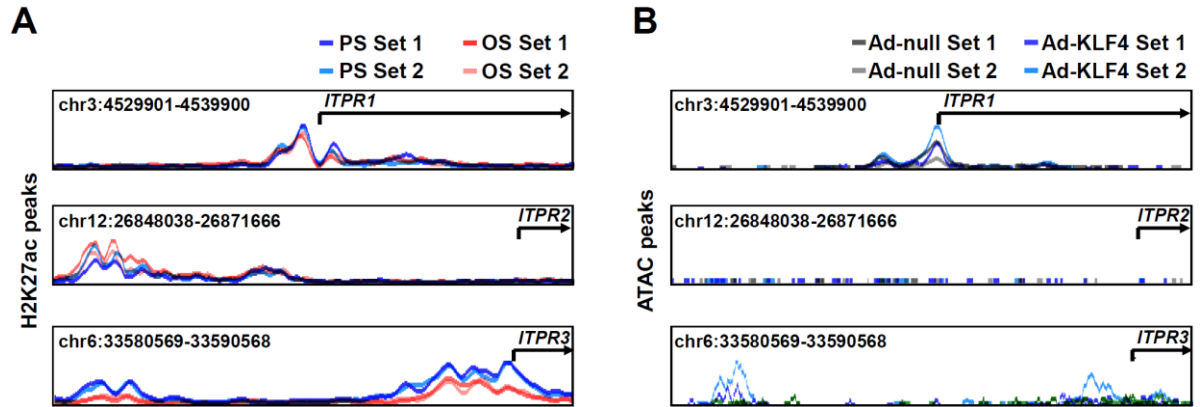

**Supplementary Figure IV. PS and KLF4 increase H3K27ac enrichment and chromatin accessibility in the *ITPR3* promoter.** (A) Normalized PS (blue)- or OS (red)-induced H3K27ac enrichments in the promoter region of the *ITPR1*, *ITPR2*, and *ITPR3* gene. (B) HUVECs were infected with Ad-null or Ad-KLF4 for 24 hr in two biological repeats. ATAC-seq was performed to evaluate the chromatin accessibility. Lines in gray (Ad-null-infected ECs) and blue (Ad-KLF4-infected ECs) represent ATAC signals in the *loci* identical to those in (A). Two biologic repeats were performed for each group. The conclusions were made by comparing the averaged values from the two sets of data.

Supplementary Figure V

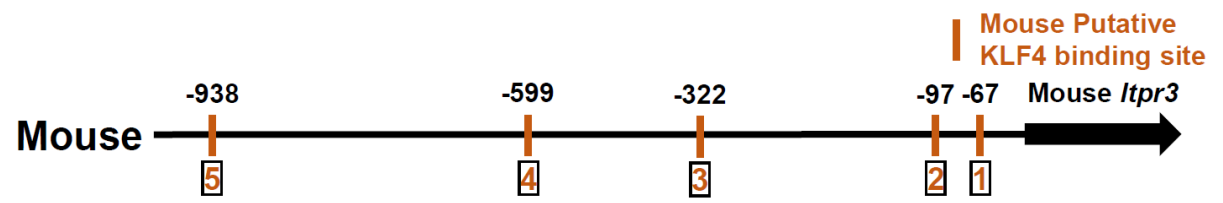

Supplementary Figure V. Putative KLF4 binding sites in the mouse *Itpr3* promoter.

## Supplementary Figure VI

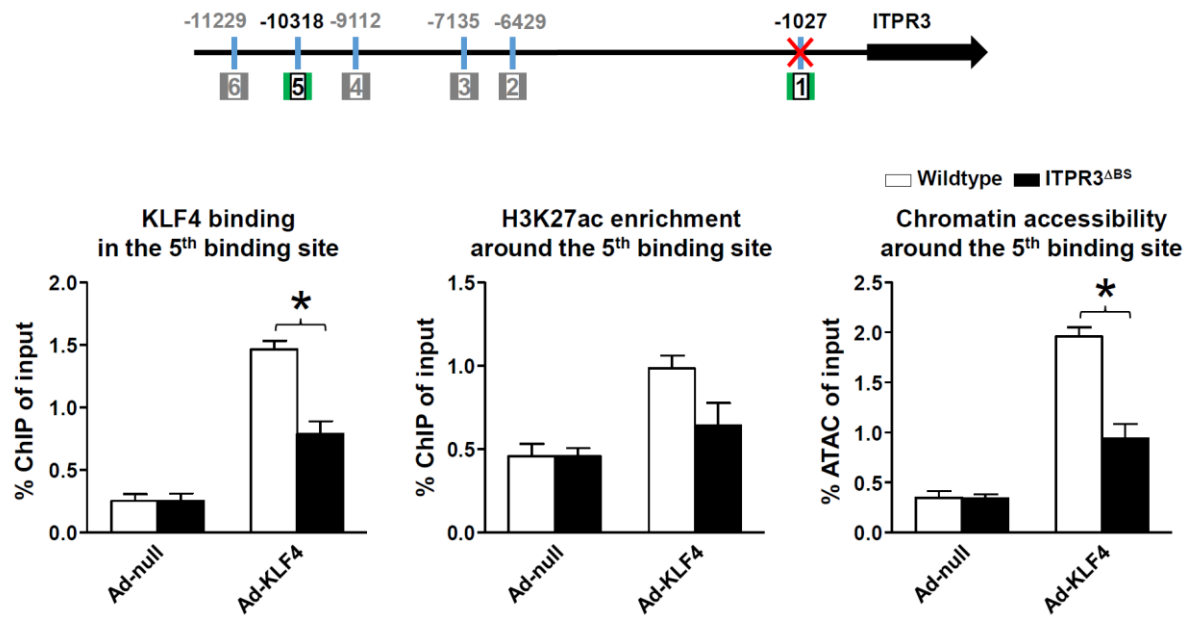

**Supplementary Figure VI. Crosstalk between KLF4 binding sites in the *ITPR3* promoter.** Wildtype or *ITPR3*<sup>ABS</sup> HUVECs were infected with Ad-null or Ad-KLF4. Twenty-four hr post infection, cells were harvested for KLF4-ChIP-, H3K27ac-ChIP-, or ATAC- qPCR to assess KLF4 binding, H3K27ac enrichment, and chromatin accessibility of the 5<sup>th</sup> binding site.

**Supplementary Table I. KLF4 binding sites in the human ITPR3 promoter**

| <b>Sites</b> | <b>Distance to TSS (bp)</b> | <b>Location</b>            | <b>Binding Sequence</b> |
|--------------|-----------------------------|----------------------------|-------------------------|
| Site 1       | -1027                       | chr6:33,587,107-33,587,115 | GGGTGTGGC               |
| Site 2       | -6429                       | chr6:33,581,705-33,581,713 | CCCCACCCA               |
| Site 3       | -7135                       | chr6:33,580,999-33,581,007 | CCGCACCCA               |
| Site 4       | -9112                       | chr6:33,579,022-33,579,030 | GGGTGCGGC               |
| Site 5       | -10318                      | chr6:33,577,816-33,577,824 | CCCCTCCA                |
| Site 6       | -11229                      | chr6:33,576,905-33,576,913 | GGGTGGGGT               |

**Supplementary Table II. Primers used for qPCR**

| <b>Gene symbol</b>                       | <b>Forward 5'-3'</b>   | <b>Reverse 5'-3'</b>    |
|------------------------------------------|------------------------|-------------------------|
| <i>For gene expression (Human genes)</i> |                        |                         |
| NOS3                                     | TGATGGCGAAGCGAGTGAAG   | ACTCATCCATACACAGGACCC   |
| KLF4                                     | CCCACATGAAGCGACTTCCC   | CAGGTCCAGGAGATCGTTGAA   |
| ITGB4                                    | CTTCACCTGCAGCTCTTTCC   | TCTCCTACCGCACACAGGA     |
| ZNF467                                   | CCTGCACGGAATGCGAGAA    | GGGGCAGTGAATGAGGAG      |
| ST6GALNAC1                               | AGAAAGGTCTCTACAGTCCCTG | TGTGTGTTGAGGGCATTGTTC   |
| CCM2L                                    | AGGGAAGAAGGGCTTTGTATCC | ATAAAGGGGCATCGAGTGCAG   |
| FAM167B                                  | CTGCACCGACTGAAGATGGAC  | CTGATGTTTCATGCGCGTGA    |
| MYOM3                                    | AGATTAGGAGATGCGCCATTG  | GTGCGGACGAGGACTTTGG     |
| ALS2CL                                   | TGGCTGACAGGAAACACTTG   | CTGCTCGAGTTCCTGGATGT    |
| CBX2                                     | AGAAGGAACATGAGAAGGAGGT | GAGGGACAGACTGTTGGCAG    |
| THBD                                     | GCATTTGCATGGTTTGTGAG   | ACACAGGCAAATCCTTGCT     |
| DAG1                                     | AAGTGACTTGGTCCCAGAGC   | AGGAGGAGCGAACACCTG      |
| TBC1D7                                   | GTTGCCAAAAGCGTTTGAACA  | CATCCCGCAAAGCACCTCTT    |
| CAMKK1                                   | CCACCCGTTCTACCAGCTC    | AATTTGGGAAGCTGTGGTGT    |
| B4GALT3                                  | GCTCCCGAACAGCCATCATT   | TCCACATCGTGCAAGAACAGG   |
| ARAP3                                    | TCAATGGGAGGAGTCTGATGT  | CTCTGTGCGGAACACGAACA    |
| RNASE1                                   | ACTGTAACCAAATGATGAGGCG | GTACCTGGAGCCGTTTGTCA    |
| SYNE3                                    | CTGCACAACGTGGACAACC    | CACTGCATCGTACTCAGCCTT   |
| TRIB3                                    | TACCTGCAAGGTGTACCCC    | GGTCCGAGTGAAAAAGGCGTA   |
| ITPR3                                    | GAGGCAGTCACGGAACCTTCT  | GTCAATGGCTTCATCAGCAC    |
| b-Actin                                  | GAGCACAGAGCCTCGCCTTT   | TCATCATCCATGGTGAGCTGG   |
| <i>For gene expression (Mouse genes)</i> |                        |                         |
| Nos3                                     | GGCTGGGTTTAGGGCTGTG    | CTGAGGGTGTCTAGGTGATG    |
| Klf4                                     | GTGCCCCGACTAACCGTTG    | GTCGTTGAACTCCTCGGTCT    |
| Itgb4                                    | GCAGACGAAGTTCGACAG     | GGCCACCTTCAGTTCATGGA    |
| Zfp467                                   | TCCTGCTCAGGGCATGAGA    | TCCGAATCATCCATTCTCCC    |
| St6galnac1                               | TGACTGTGTTGGCATTGCTCT  | CTCCTGTTTCTTCAGGTCTTTG  |
| Ccm2l                                    | TGTCCCCATCCGAAGACT     | GGATAAAGAGGCATAGAGTGCAG |
| Fam167b                                  | CGGCTGCACAGACTGAAAGT   | TGATGTTTCATGCGCGTGAGT   |
| Myom3                                    | CTCTGGCTGGAACGTGGAAAT  | CCTTCTCGTTGAAGATGAGGTG  |
| Als2cl                                   | TCTCAACGACTCTTGCTCGAA  | CTCTGTACATAACCACAACCG   |
| Cbx2                                     | GGCTGGTCCCTCAAACACAA   | CCCTGGGTCTCTTGCTCT      |
| Thbd                                     | CTCTCCGCACTAGCCAAGC    | GGAGCGCACTGTCATCAAATG   |
| Dag1                                     | CTTGAGGCGTCCATGCACT    | GGCAATTAAATCCGTTGGAATGC |
| Tbc1d7                                   | GGATCAGCCGATGCTTCGT    | GTGACTCAGCAGCCTACTGTC   |
| Camkk1                                   | TGGCCCACTTGGAAAGAAGC   | GGAGAACTTTCTAGCCGAGAGG  |
| B4galt3                                  | ATGATGTATCTGTCAGTGGGG  | GGACCCACTAAGAAGGGTGAT   |
| Arap3                                    | AGGCCCTGATAAGCAAAGG    | CACAGCGATGTCCAGGTCC     |
| Rnase1                                   | CTGCAACCAAATGATGAAACGC | CCTTCAGGTGGCAGTCAGTG    |
| Syne3                                    | TGGAGGCAAGGCTTCGAGA    | TTCTGGAACCAGCGGTAAAC    |



|                                   |                         |                           |
|-----------------------------------|-------------------------|---------------------------|
| Trib3                             | GCAAAGCGGCTGATGTCTG     | AGAGTCGTGGAATGGGTATCTG    |
| Itp3                              | GGGCGCAGAACAACGAGAT     | GAAGTTTTGCAGGTCACGGTT     |
| <i>For ChIP-qPCR or ATAC-qPCR</i> |                         |                           |
| KLF4 promoter                     | GGCGCAGGTTTCGGTCG       | GCTGACCCCACCAGTCTTCG      |
| NOS3 promoter                     | CCGAACACCAAATCTCCAACC   | AGCCCTGCCAAGAATGATGC      |
| VCAM1 promoter                    | AGAACAGGAGCTGATAATGCTGT | AAGGCAATGAAGGAGCCTAGT     |
| SELE promoter                     | AGGCCAGAACCCCACTTGTA    | TTCTTTAGCAGCTATTCTCTCTTGC |
| <i>ITPR3 promoter</i>             |                         |                           |
| ITPR3 -1027                       | GAGGTGGATTCCCTGGGTGTG   | ACCGTGAGGATGAAGAGGGA      |
| ITPR3 -6429                       | GCTTATGGCATGGGGAAGGA    | CCTGACTCAGTGTAGCAGCC      |
| ITPR3 -7135                       | ACTGTGACTGTGAAGGTGCC    | TTACTAGGTGCCCCCTCCTC      |
| ITPR3 -9112                       | AGGGCCTTAGTCCTGCCAA     | GACAGAGGTGAAAAGCATGACG    |
| ITPR3 -10318                      | GACAGGGAGTGGGCTTCAAA    | GAGCCACAGGAAGGGATTGG      |
| ITPR3 -11229                      | CTCCATGATGGCTGCTCTCC    | AAACCAGCCAGGTGCTCTC       |
| ITPR3 Pol II                      | GGCACCTATCTTAGGCGTT     | TACTTTCTGTTCTGTTCCCCG     |
